# Supplementary material
Source: PubMed Central journal article supplement (PMC8463885)
Supplement: pnas.2101592118.sapp.pdf [file pnas.2101592118.sapp.pdf]

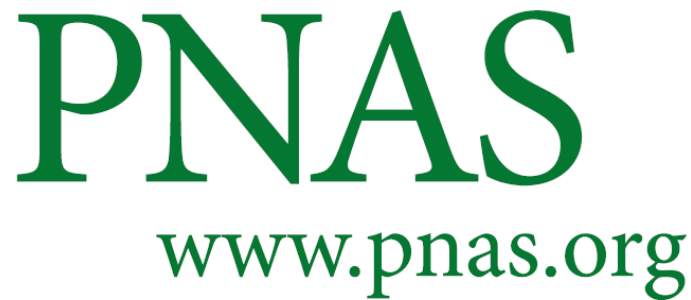

## Supplementary Information for

### Therapeutic Inhibition of USP9x-Mediated Notch signaling in Triple-Negative Breast Cancer

Arushi Jaiswal<sup>1,2</sup>, Kiichi Murakami<sup>2</sup>, Andrew Elia<sup>2</sup>, Yukiko Shibahara<sup>3,4</sup>, Susan J. Done<sup>3,4</sup>, Stephen A. Wood<sup>5</sup>, Nicholas Donato<sup>6</sup>, Pamela S. Ohashi<sup>1,2,7</sup> and Michael Reedijk<sup>1,2,8,\*</sup>

<sup>1</sup> Department of Medical Biophysics, University of Toronto, Toronto, Ontario, Canada.

<sup>2</sup> Princess Margaret Cancer Centre, University Health Network, Toronto, Ontario, Canada.

<sup>3</sup> Department of Laboratory Medicine and Pathobiology, University of Toronto, Toronto, Ontario, Canada.

<sup>4</sup> Laboratory Medicine Program, University Health Network, Toronto, Ontario, Canada.

<sup>5</sup> Griffith Institute for Drug Discovery, Griffith University, Brisbane 4111, Australia.

<sup>6</sup> Department of Internal Medicine/Division of Hematology/Oncology, University of Michigan, School of Medicine and Comprehensive Cancer Center, Ann Arbor, MI 48109, USA.\*

\*Current address: Center for Scientific Review, National Institutes of Health, Bethesda, MD 20892, USA.

<sup>7</sup> Department of Immunology, University of Toronto, Toronto, Ontario, Canada.

<sup>8</sup> Department of Surgical Oncology, University Health Network, Toronto, Ontario, Canada.

\*Corresponding author: Michael Reedijk; **Email:** [michael.reedijk@uhn.ca](mailto:michael.reedijk@uhn.ca)

#### **This PDF file includes:**

Figures S1 to S7

Tables S1 to S2

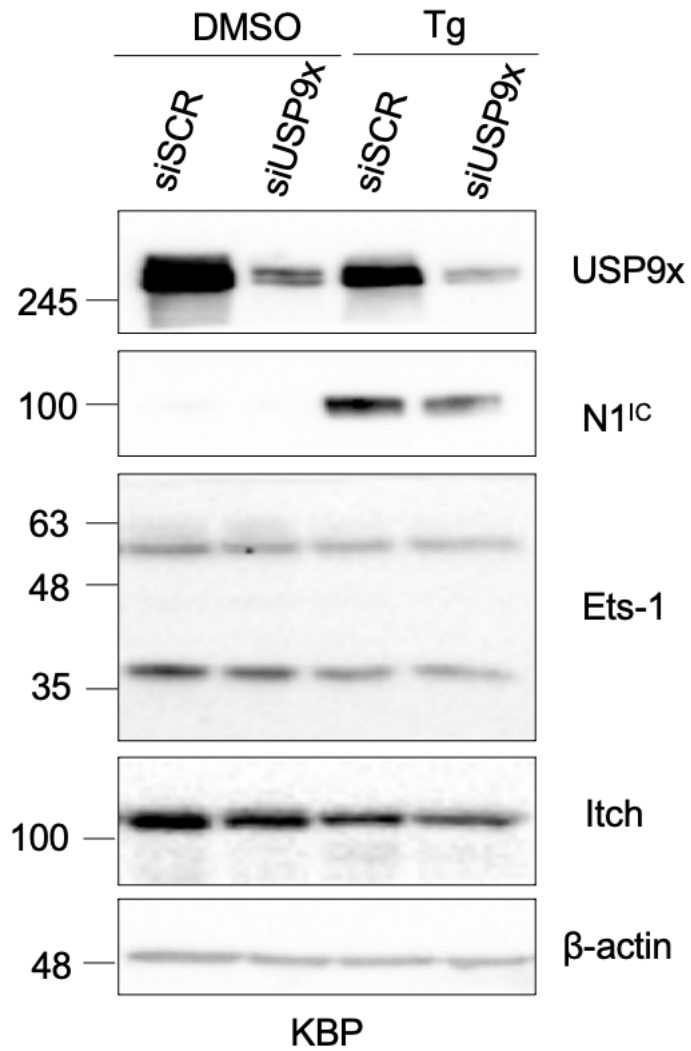

**Suppl Fig 1. USP9x knockdown does not affect the expression of Ets-1 or Itch in KBP cells.** Immunoblot of USP9x, N1<sup>IC</sup>, Ets-1 and Itch in KBP cells transfected with either siSCR or USP9x siRNA and treated with either DMSO or 1 μM Tg. β-actin is included as a loading control. Mw markers are shown in kilodaltons.

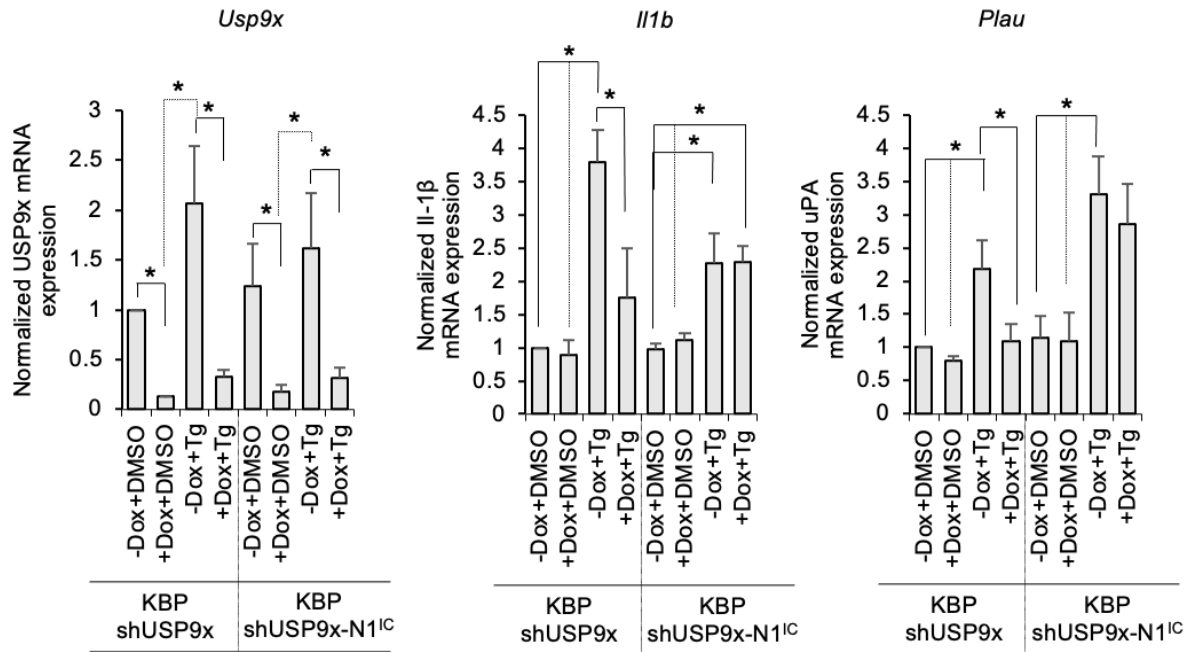

**Suppl Fig 2. Ectopic N1<sup>IC</sup> expression rescues the effect of USP9x knockdown on the expression of Notch target genes.** qPCR analysis of *Usp9x* and Notch target genes (*Il1b* and *Plau*) in uninfected or retrovirus infected (expressing N1<sup>IC</sup>) KBP shUSP9x and treated with either DMSO or 1  $\mu$ M Tg in the absence or presence of doxycycline. Expression levels were normalized to GAPDH. Experiments were performed in triplicate; error bars represent SEM. The asterisks (\*) denotes  $P < 0.05$  relative to the respective control.  $P$  values are determined by one-way ANOVA and corrected for multiple comparisons using Tukey's test.

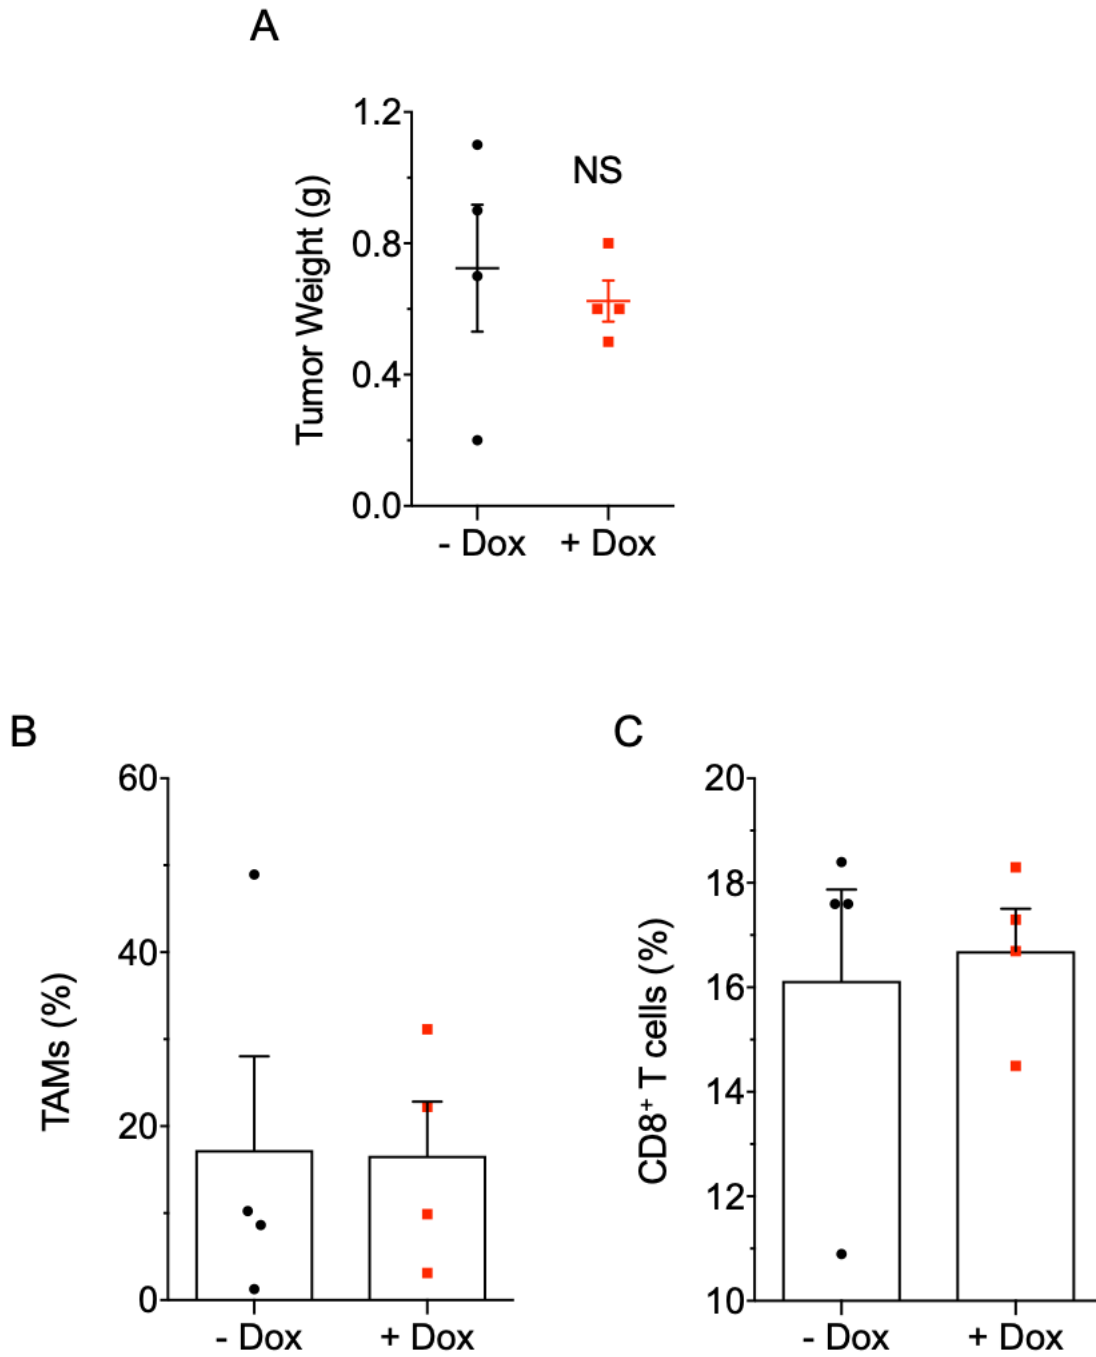

**Suppl Fig 3. Doxycycline treatment has no effect on KBP allograft growth. (a)** Weight of KBP allografts fed a regular or doxycycline-containing diet (n = 4 per group). **(b and c)** Quantification (by flow cytometry) of TAMs (Gr-1<sup>-</sup> F4/80<sup>+</sup> CD11b<sup>+</sup>) **(b)** and CD8<sup>+</sup> T **(c)** infiltrates in KBP tumors expressed as % of CD45<sup>+</sup> cells. Error bars represent SEM. NS, non-significant. *P*-value is determined by the two-tailed Student's *t*-test.

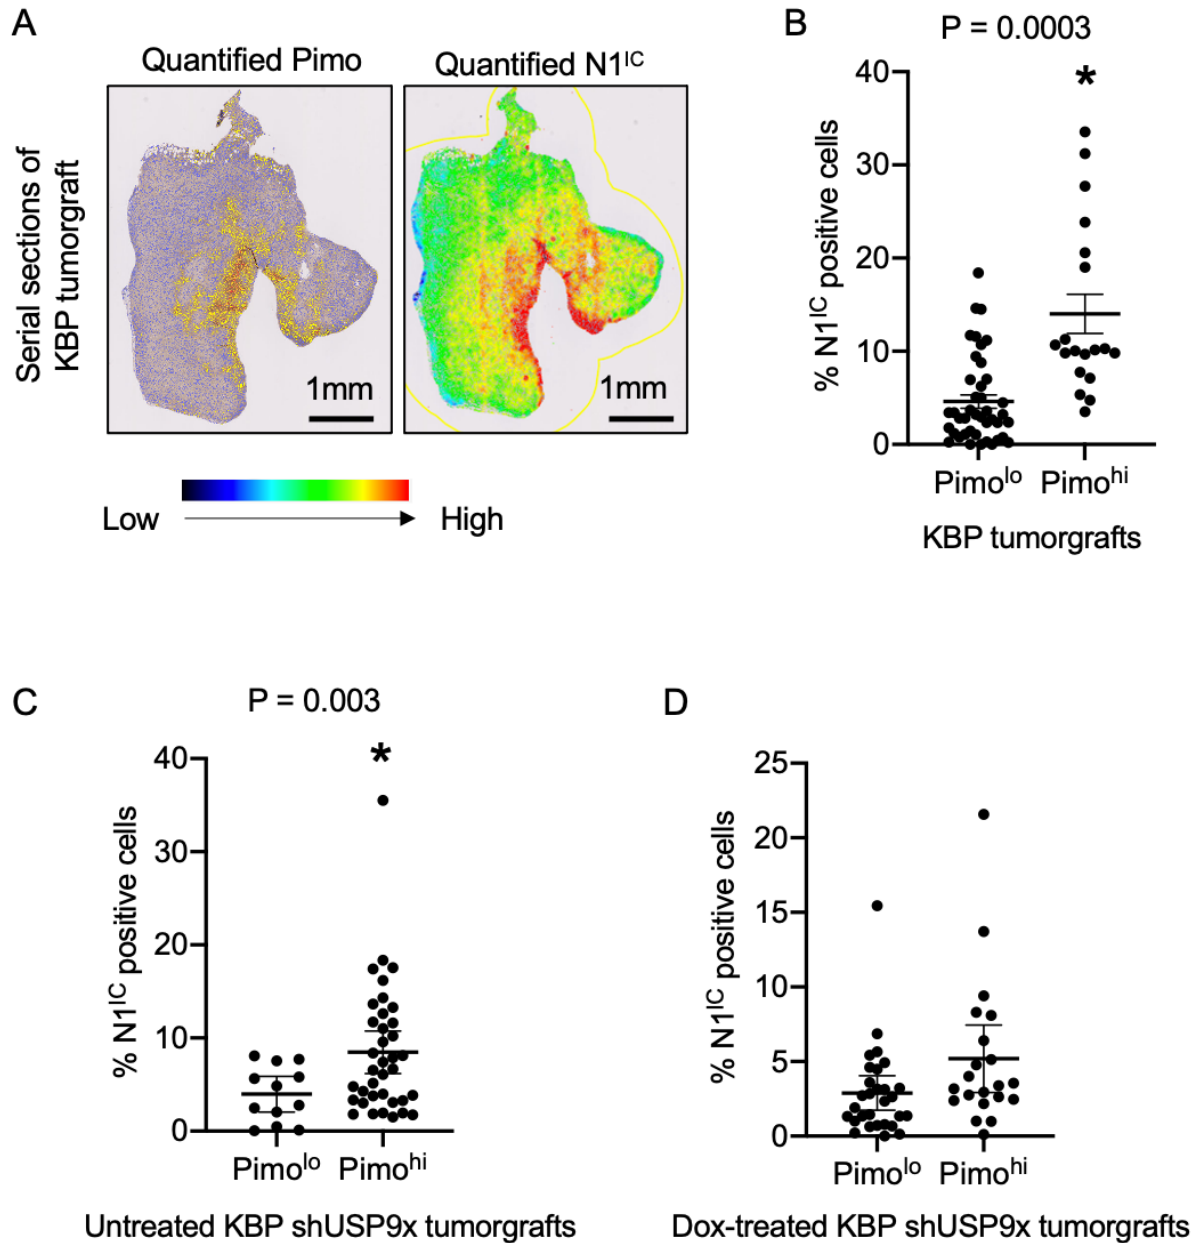

**Suppl Fig 4. Co-localization of hypoxia and Notch activation is USP9x-dependent.** (a) Representative quantified IHC images of the hypoxia marker pimonidazole (Pimo) and N1<sup>IC</sup> in serial sections of KBP allografts. The color bar indicates the expression level of Pimo and N1<sup>IC</sup>. Scale bars: 1mm. (b-d) Percentage of N1<sup>IC</sup>+ cells in Pimo<sup>lo</sup> (< 20% pimo<sup>+</sup> cells) vs Pimo<sup>hi</sup> (> 20% cells Pimo<sup>+</sup>) regions of KBP (b), untreated KBP shUSP9x (c) and doxycycline-treated KBP shUSP9x (d) allografts (14-18 x 20,000 μm<sup>2</sup> regions were surveyed in n = 4 tumors per group). Error bars represent SEM. \* = P < 0.05. P indicates the significance value determined by the two-tailed Student's *t*-test with Welch's correction for unequal variances.

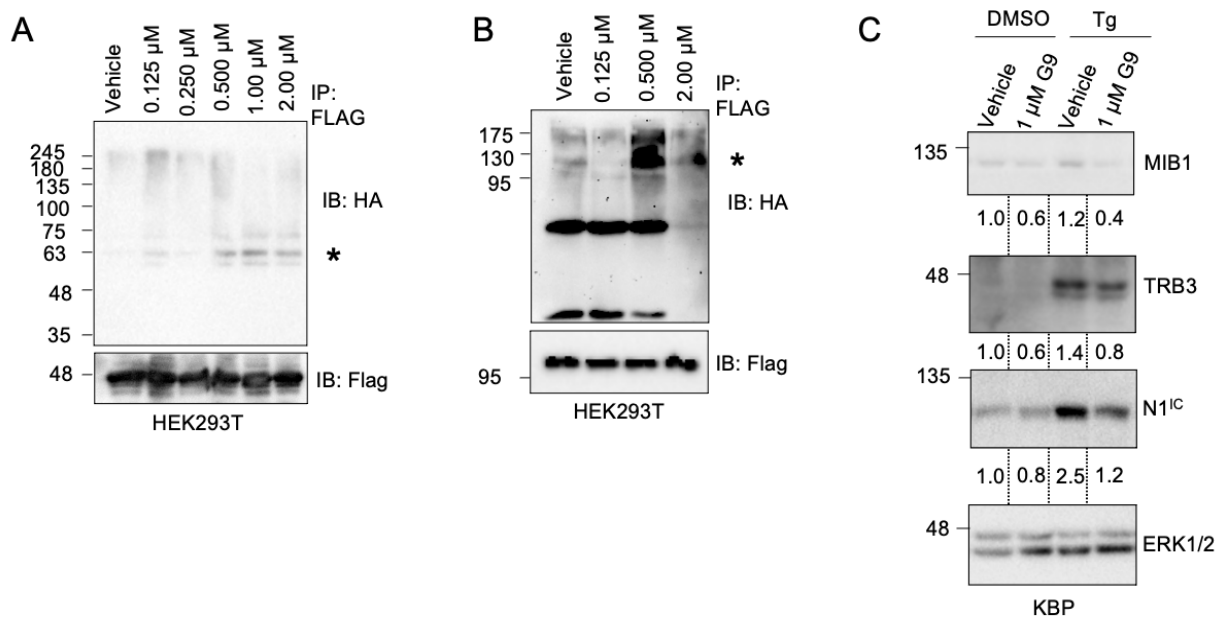

**Suppl Fig 5. G9 inhibits stress-induced Notch activation in murine KBP cells.**

Immunoblot of HA and Flag after anti-Flag immunoprecipitations from HEK293T cells transfected with plasmids expressing HA-Ub and either TRB3-Flag (**a**) or MIB1-Flag (**b**) and treated with either vehicle or varying concentrations of G9 in the presence of proteasome inhibitor, MG132. \* marks the predicted size of monoubiquitinated TRB3-Flag-HA-Ub (**a**), or MIB1-Flag-HA-Ub (**b**). (**c**) Immunoblot of MIB1, TRB3, and N1<sup>IC</sup> in KBP cells treated with either vehicle or 1 μM G9 and treated with either DMSO or 1 μM Tg. Expression of ERK1/2 is included as a loading control. Expression of MIB1, TRB3 and N1<sup>IC</sup> are determined by densitometry and quantified relative to ERK1/2. *Mw* markers are shown in kilodaltons.

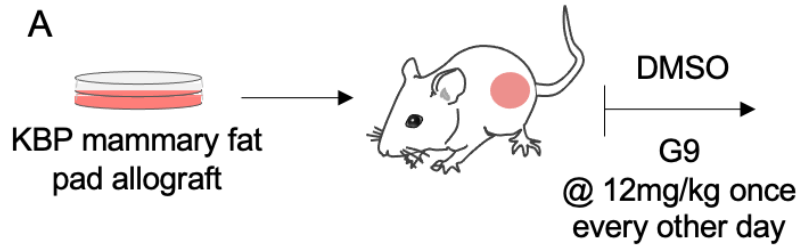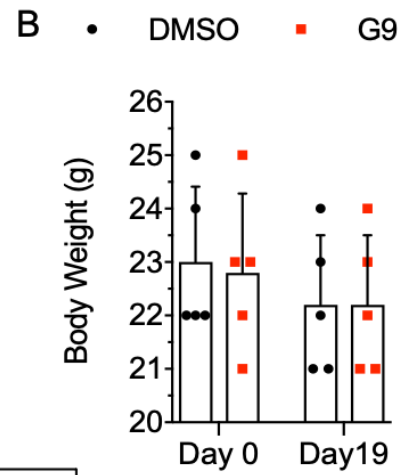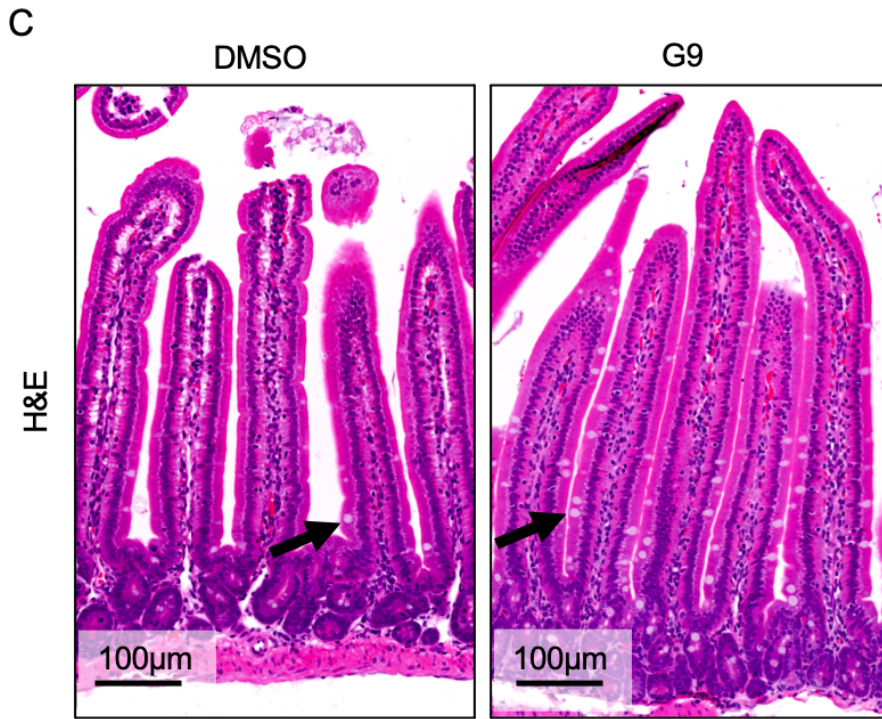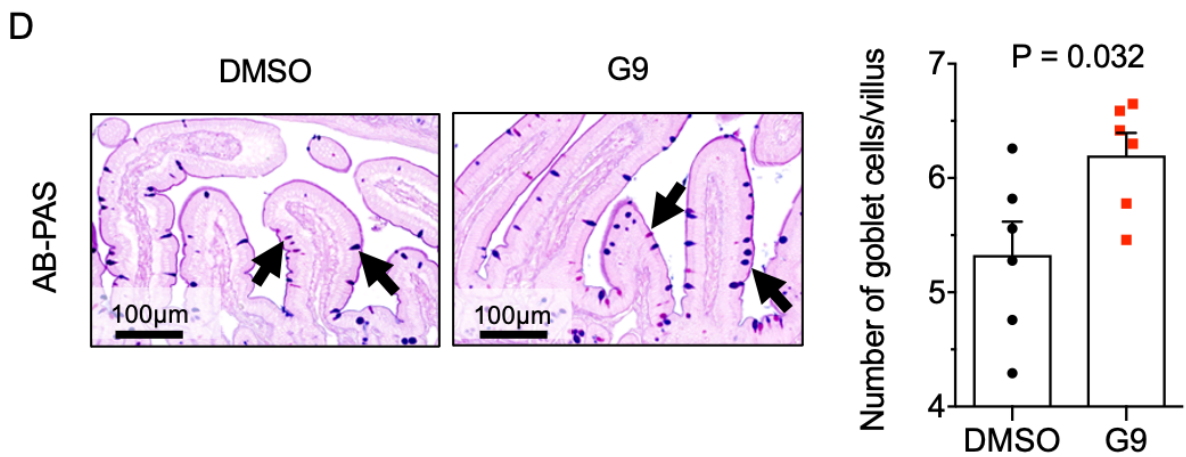

**Suppl Fig 6. The effect of G9 on the gastrointestinal epithelium. (a)** Schematic diagram of the experimental design. **(b)** Bodyweight of animals treated with DMSO or G9 (n = 5 mice per group). **(c)** Representative images of H&E-stained sections of murine intestinal villi. **(d)** Left panel: representative images of AB-PAS-stained sections of murine intestinal villi. Right panel: quantification of intestinal goblet cells (i.e secretory cells) from AB-PAS-stained sections (n = 6 mice). Arrows in **(c)** and **(d)** indicate goblet cells. Error bars represent SEM. Scale bars: 100 $\mu$ m. *P* values are determined by the two-tailed Student's *t*-test.



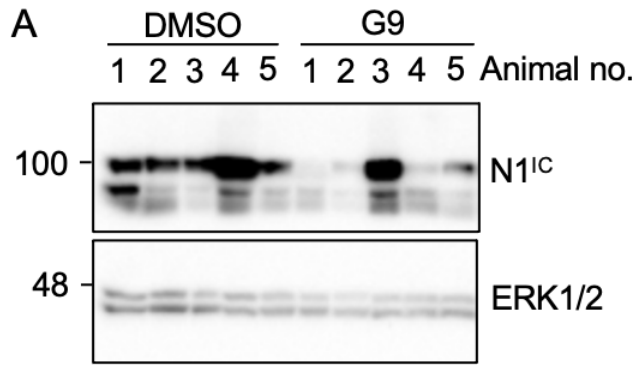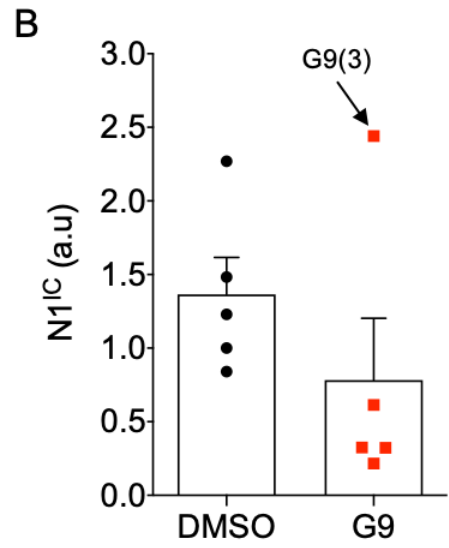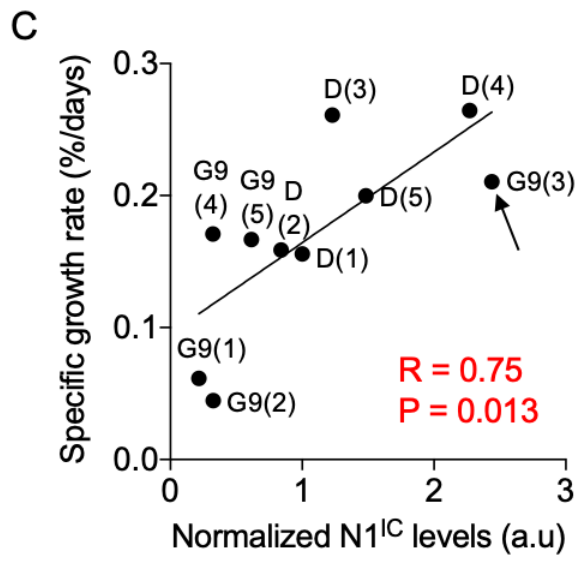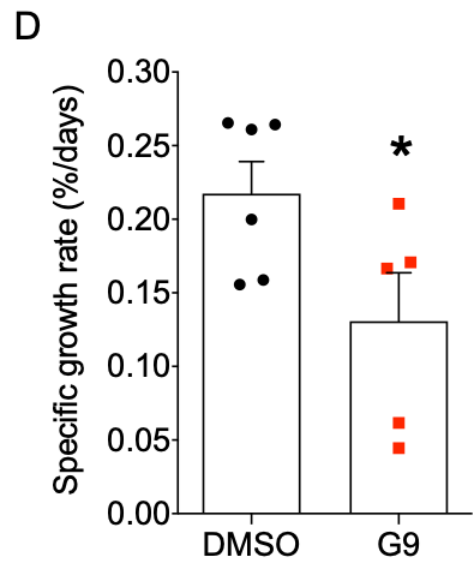

**Suppl Fig 7. G9 suppresses Notch-dependent KBP tumor growth.** (a) Immunoblot of N1<sup>IC</sup> in lysates of spontaneous KBP tumors treated with DMSO or G9. The expression of ERK1/2 is included as a loading control. *Mw* markers are shown in kilodaltons. (b) Expression of N1<sup>IC</sup> determined by densitometry relative to ERK1/2. The arrow indicates N1<sup>IC</sup> expression in G9-treated tumor #3. (c) Correlation analysis of specific growth rate (SGR; calculated using the formula  $\ln(V_2/V_1)/\Delta t$ , where  $V_1$  and  $V_2$  are the measured tumor volumes at the beginning and end of treatment respectively, and  $\Delta t$  is the treatment duration) with tumoral N1<sup>IC</sup> levels. Each data point is labelled with the sample ID (treatment type followed by sample number). R indicates the degree of correlation and P indicates the significance value determined through the Pearson correlation test. (d) SGR of KBP tumors treated with DMSO or G9 (DMSO, n = 6 tumors; G9, n = 5 tumors). Error bars represent SEM. \* = P < 0.05. P values are determined by the two-tailed Student's *t*-test for (b) and (d).

**Suppl Table 1. Sequences and Primers**

| <b>siRNA</b>              | <b>Sequence</b>                                                                          |                        |
|---------------------------|------------------------------------------------------------------------------------------|------------------------|
| <b>siscr</b>              | UGGUUUACAUGUCGACUAA<br>UGGUUUACAUGUUGUGUGA<br>UGGUUUACAUGUUUUCUGA<br>UGGUUUACAUGUUUCCUA  |                        |
| <b>siTRB3</b>             | GCAGAUACCCAUUCCACGA<br>GAGAGAGGAUCACGGCCGA<br>CUGGAAGAUGCCUGCGUGA<br>AGGUGGGGCUGUACGGCUA |                        |
| <b>siUSP9x</b>            | CAAAGGAGAUUUACUAGAA<br>AGAAAUCGCUGGUUAAA<br>ACACGAUGCUIUAGAAUUU<br>GUACGACGAUGUUAUCUCA   |                        |
| <b>shRNA</b>              | <b>Sense</b>                                                                             | <b>Anti-sense</b>      |
| <b>shUSP9x (5'-3')</b>    | GATGAGGAACCTGCATTTTC                                                                     | GAAATGCAGGTTCCCTCATC   |
| <b>qRT-PCR</b>            | <b>Forward Primer</b>                                                                    | <b>Reverse Primer</b>  |
| <b>Mouse <i>Usp9x</i></b> | AAGGAGCTACTGGCTTTTTCAGA                                                                  | GATGCGGGAAAGATGAAGTC   |
| <b>Mouse <i>Plau</i></b>  | GACAGCCTGGCCTACCATAA                                                                     | AGTCTGAACCAAACGGAGCA   |
| <b>Mouse <i>Il1b</i></b>  | CTCTTGTTGATGTGCTGCTG                                                                     | GACCTGTTCTTTGAAGTTGACG |

**Suppl Table 2. Antibodies**

| <b>Immunoblot and IHC</b>                        | <b>Source</b>            | <b>Catalog no.</b> |
|--------------------------------------------------|--------------------------|--------------------|
| <b>USP9x</b>                                     | Bethyl Laboratories      | A301-351A          |
| <b>TRB3</b>                                      | Santa Cruz Biotechnology | sc-365842          |
| <b>MIB1</b>                                      | Abcam                    | ab245766           |
| <b>JAG1</b>                                      | CST                      | 2620               |
| <b>Cleaved Notch1 [Val1744]</b>                  | CST                      | 4147               |
| <b>Notch1 (to detect ectopic N1<sup>C</sup>)</b> | Santa Cruz Biotechnology | sc-6014            |
| <b>p44/42 MAPK (ERK1/2)</b>                      | CST                      | 9102               |
| <b>HA</b>                                        | Santa Cruz Biotechnology | sc-805             |
| <b>Flag</b>                                      | Santa Cruz Biotechnology | sc-807             |
| <b>β-actin</b>                                   | Santa Cruz Biotechnology | sc-1615            |
| <b>Ets-1</b>                                     | CST                      | 14069              |
| <b>AIP4 / Itch</b>                               | Santa Cruz Biotechnology | sc-11890           |
| <b>CCL2/MCP-1</b>                                | Santa Cruz Biotechnology | sc-1785            |
| <b>IL-1β</b>                                     | CST                      | 12242              |
| <b>anti-Mouse IgG, HRP-linked</b>                | CST                      | 7076               |
| <b>anti-Rabbit IgG, HRP-linked</b>               | CST                      | 7074               |
| <b>anti-goat IgG, HRP-linked</b>                 | Santa Cruz Biotechnology | sc-2020            |
| <b>Pimonidazole</b>                              | Hypoxyprobe              | PAb2627            |
| <b>SMA</b>                                       | Abcam                    | ab5964             |
| <b>ELISA</b>                                     | <b>Source</b>            | <b>Catalog no.</b> |
| <b>CCL2</b>                                      | R&D                      | DY479-05           |
| <b>IL-1β</b>                                     | R&D                      | DY401-05           |
| <b>Flow cytometry</b>                            | <b>Source</b>            | <b>Catalog no.</b> |
| <b>CD45</b>                                      | eBioscience              | 63-0451-82         |
| <b>CD3</b>                                       | Biologend                | 100234             |
| <b>F4/80</b>                                     | eBioscience              | 17-4801-82         |
| <b>CD11b</b>                                     | BD biosciences           | 553310             |
| <b>CD206</b>                                     | Biologend                | 141719             |
| <b>CD8</b>                                       | eBioscience              | 45-0081-82         |
| <b>GrmB</b>                                      | Invitrogen               | 48-8898-82         |
| <b>FoxP3</b>                                     | eBioscience              | 12-5773-80         |
| <b>Gr-1</b>                                      | eBioscience              | 45-5931-80         |
| <b>Viability</b>                                 | eBioscience              | 65-0865-14         |
